1 Identification and characterization of *Aedes albopictus* long noncoding  
2 RNAs provides insights into their roles in development and flavivirus  
3 infection

4  
5 **Azali Azlan<sup>1</sup>, Muhammad Amir Yunus<sup>2</sup> and Ghows Azzam<sup>1\*</sup>**

6  
7  
8 <sup>1</sup>*School of Biological Sciences, Universiti Sains Malaysia, 11800 Penang, Malaysia*

9 <sup>2</sup>*Infectomics Cluster, Advanced Medical & Dental Institute, Universiti Sains Malaysia, Bertam, 13200*  
10 *Kepala Batas, Pulau Pinang, Malaysia.*

11

12

13

14

15

16

17 \*Corresponding author

18 Email: [ghows@usm.my](mailto:ghows@usm.my) (G.A)

19

20

21

22

23

24 **Key words: *Aedes albopictus*, long noncoding RNA, dengue virus, zika virus, transcriptome**

25 **Abstract**

26 *Aedes albopictus* (*Ae. albopictus*) is an important vector of arboviruses such as Dengue virus  
27 (DENV), Chikungunya virus (CHIKV), and Zika virus (ZIKV). Long noncoding RNA (lncRNAs) have  
28 been identified in other vectors including *Aedes aegypti* and *Anopheles* mosquitoes, few of which have  
29 been implicated in immunity and viral replication. To identify lncRNAs with potential biological  
30 functions in *Ae. albopictus*, we performed RNA-seq on *Ae. albopictus* cells infected with DENV and  
31 ZIKV, and analyzed them together with public datasets. We identified a total of 23,899 transcripts,  
32 16,089 were intergenic while 3,126 and 4,183 of them were antisense and intronic to annotated genes  
33 respectively. *Ae. albopictus* lncRNAs shared many of the characteristics with their invertebrate and  
34 vertebrate counterparts, such as low expression, low GC content, short in length, and low conservation  
35 even among closely related species. Compared to protein-coding genes, lncRNAs exhibited higher  
36 tendency to be expressed in a stage-specific manner. Besides, expression of lncRNAs and nearest  
37 protein-coding genes tended to be correlated, especially for the gene pairs within 1kb from each other.  
38 We also discovered that *Ae. albopictus* lncRNAs have the potential to act as precursors for miRNA and  
39 piRNAs, both of which have been implicated in antiviral defense in *Aedes* mosquito. Upon flavivirus  
40 infection, lncRNAs were observed to be differentially expressed, which possibly indicates the  
41 involvement of lncRNAs in the host-antiviral defense. Our study provides the first systematic  
42 identification of lncRNAs in *Ae. albopictus*, hence, offering a foundation for future studies of lncRNA  
43 functions.

44

45

46

47

48

49

## 50 **Introduction**

51           The Asian tiger mosquito, *Aedes albopictus* (*Ae. albopictus*) is an important vector of  
52 arboviruses such as Dengue virus (DENV), Chikungunya virus (CHIKV), and Zika virus (ZIKV). Due  
53 to its invasiveness and aggressive spread, *Ae. albopictus* has widespread geographic distribution,  
54 posing serious health threat across the globe in both tropical and temperate regions. Although *Ae.*  
55 *albopictus* is considered as less competent vector of DENV than *Aedes aegypti* (*Ae. aegypti*), *Ae.*  
56 *albopictus* was responsible for dengue outbreaks in Hawaii, China, and Europe, primarily because of its  
57 fast expansion across the globe (Chen et al., 2015).

58           Although protein-coding genes have been the central focus, many reports have indicated that  
59 noncoding RNAs (ncRNAs), such as long noncoding RNAs (lncRNAs) and small RNAs, play  
60 important roles in development and virus-host interaction (Etebari et al., 2017, 2016; Liu et al., 2015;  
61 Miesen et al., 2016a, 2016b). Although lncRNAs lack coding potential, similar to mRNAs, they are the  
62 products of Pol II, and they undergo polyadenylation, capping and alternative splicing (Ulitsky and  
63 Bartel, 2013). Due to their mRNA-like features, lncRNAs are usually represented in RNA-seq datasets.  
64 Next-generation sequencing allows quick genome-wide identification of lncRNAs including the lowly  
65 expressed transcripts, and this technology is independent on complete genome and gene annotation,  
66 making it an ideal strategy to detect novel lncRNAs (Wang et al., 2009; Wilhelm et al., 2010).

67           lncRNAs act by various mechanisms. Several lncRNAs have been shown to modulate the  
68 chromatin state, thereby; regulating gene expression inside cells (Wang et al., 2011) Meanwhile, other  
69 lncRNAs were associated with post-transcriptional regulation such as Malat1, which is important for  
70 alternative splicing of mRNA transcripts (Tripathi et al., 2010). lncRNA was also shown to be involved  
71 in virus-host interaction in *Ae. aegypti*. For example, knockdown of lincRNA\_1317 in *Ae. aegypti* cells  
72 resulted in an increased replication of DENV (Etebari et al., 2016). Another potential role of lncRNAs  
73 is to act as precursors or templates for the generation of mature small RNAs (Yoon et al., 2014). Small  
74 RNAs in metazoa can be categorized into three distinct groups based on their biogenesis and

75 mechanism of action (Azlan et al., 2016; Siomi et al., 2011): microRNAs (miRNAs), small-interfering  
76 RNAs (siRNAs), and PIWI-interacting RNAs (piRNAs). miRNAs, ~22 nucleotide (nt) in length,  
77 function in the regulation of gene expression in both animals and plants by targeting cognate messenger  
78 RNAs (mRNAs) via imperfect base-pairing, resulting in either mRNA cleavage or translational  
79 repression (Mallory and Vaucheret, 2010). siRNAs are ~ 21 to ~24 nt RNAs in length that originate  
80 from long double-stranded RNA (dsRNA) or hairpins, both of which can be encoded endogenously in  
81 the genome or can be exogenously introduced into the cells. piRNAs (~24-35 nt in length) function to  
82 control the activity of transposable element (TE); thereby, ensuring the inheritance of genomic  
83 information from one generation to another unscathed (Siomi et al., 2011). Studies of piRNAs and their  
84 protein partners, PIWI proteins, in mice and flies have led to the proposal of two piRNA biogenesis  
85 pathways: primary pathway and secondary ping-pong amplification cycle (Brennecke et al., 2007).  
86 piRNA biogenesis begins with the transcription of piRNA precursor mainly from distinct loci in the  
87 genome that are referred to as piRNA clusters. The primary biogenesis pathway is thought to contribute  
88 to the initial population of piRNAs, and the ping-pong amplification cycle, then amplifies the piRNA  
89 pool that targets active TE. The two pathways work together to elicit effective defense against active  
90 transposons. (Brennecke et al., 2007; Siomi et al., 2011).

91 Here, we report the first systematic genome-wide identification and characterization of  
92 lncRNAs in *Ae. albopictus*. To identify a set of high confident lncRNA transcripts, we performed RNA-  
93 seq based de novo transcript discovery, and applied stringent filtering of transcripts having coding  
94 potential. We then characterized each lncRNA by many features such as transcript structures,  
95 conservation, and developmental expression. We also investigate the functional link of lncRNAs and  
96 small RNAs, especially miRNAs and piRNAs. Beside that, we examined the lncRNA expression  
97 landscape upon viral-infection to gain insights into the lncRNA functions in virus-host interaction.  
98 Although our knowledge on mosquito-virus interaction in *Ae. albopictus* is still limited, results  
99 generated from this study will provide invaluable resources for future investigations. Thorough

100 understanding on the intricate relationship between viruses and mosquitoes at cellular level, which  
101 involved both coding and non-coding genes, is crucial for devising efficient strategies for vector  
102 control.

103

## 104 **Results**

### 105 **Genome-wide identification of lncRNAs in *Ae. albopictus***

106 To identify novel lncRNAs, we generated 9 paired-end RNA-seq libraries (triplicate of C6/36  
107 cells at rest, DENV1-infected, and ZIKV-infected) and analyzed them together with 185 publicly  
108 available RNA-seq libraries generated from *Ae. albopictus*. To get high confident lncRNA transcripts,  
109 we applied a stringent identification pipeline that was adapted with slight alterations from lncRNA  
110 identification studies in other species (Azlan et al., 2018; Chen et al., 2016; Etebari et al., 2016;  
111 Hezroni et al., 2015; Wu et al., 2016; Young et al., 2012). An overview of lncRNA identification  
112 pipeline can be found in **Figure 1**. The pipeline began with alignment of each RNA-seq library against  
113 *Ae. albopictus* genome (assembly: canu\_80X\_arrow2.2, strain: C6/36, VectorBase) using HISAT2  
114 (Kim et al., 2015), followed by assembly of RNA-seq alignments into potential transcripts by Stringtie  
115 (Pertea et al., 2015). The transcript assemblies were then merged using Stringtie, yielding a total of  
116 252,453 transcripts derived from 137,743 loci.

117 We annotated and compared the transcripts with reference annotation using Gffcompare  
118 (Trapnell et al., 2010). For downstream analysis, we only chose novel transcripts that were intergenic,  
119 intronic and antisense to the reference genes – all of which made a total of 37,927 transcripts. Out of  
120 37,927 transcripts, 10,933 were shown to be coding by TransDecoder, and they were discarded. The  
121 remaining 26,994 transcripts were subjected for coding potential assessment by three different  
122 softwares, namely CPAT (Wang et al., 2013), CPC2 (Kang et al., 2017), and CNCI (Sun et al., 2013).  
123 We found that 25,868 transcripts were identified to be noncoding in all three algorithms. We then  
124 performed BLASTX against Swissprot protein database, and 977 transcripts having significant hits (E-

125 value  $< 10^{-5}$ ) were discarded. Finally, we examined the strandedness of the remaining 24,891  
126 transcripts, and transcripts without strand information were removed. Detailed description on the  
127 prediction analysis and parameter used can be found in **Material and Methods** section.

128 In this study, we identified a set of 23,998 novel lncRNA transcripts derived from 20,886 loci.  
129 The number of intergenic, intronic and antisense lncRNAs were 16,089, 4,183, and 3,126 respectively.  
130 Current annotation listed 8,571 lncRNA transcripts; hence, altogether, the total number of lncRNAs in  
131 *Ae. albopictus* were 32,569 transcripts.

132

### 133 *Ae. albopictus* lncRNAs shared similar genomic features with other species

134 Studies done in other species revealed that, compared to protein-coding gene, lncRNAs are  
135 typically shorter in length, have low GC content, have high repeat contents, and their sequence  
136 conservation is relatively low even among closely related species (Azlan et al., 2018; Chen et al., 2016;  
137 Etebari et al., 2016; A. Pauli et al., 2012; Wu et al., 2016; Young et al., 2012). Our analysis showed  
138 that *Ae. albopictus* lncRNAs shared similar characteristics with their vertebrate and invertebrate  
139 counterparts. We found that lncRNA transcripts were shorter than protein-coding mRNA (**Figure 2A**).  
140 Coding mRNA transcripts had a mean length of 2,659 bp, while the average size of novel and known  
141 lncRNAs was 662.9 bp and 697 bp respectively. Besides, both novel and known lncRNAs had lower  
142 GC content than the coding transcripts. Average GC content of novel and known lncRNAs were 42.4%  
143 and 42.8% respectively while coding sequence had the mean GC content of 51.3% (**Figure 2B**). Not  
144 only lncRNAs had lower GC content, but other non protein-coding sequence in the genome, including  
145 intron, intergenic regions, 5'UTR and 3'UTR, also had lower GC content.

146 Similar to previous reports (Hezroni et al., 2015; Nam and Bartel, 2012; Wu et al., 2016), we  
147 found that lncRNA transcripts had higher composition of repeat content compared to coding mRNA  
148 2.37% and 0.08% on lncRNA and protein-coding exon nts respectively were embedded within repeat  
149 elements. Repeat elements embedded within lncRNAs include hellitron, LINE, SINE, satellites, and

150 LTR. More than 90% of both novel and known lncRNAs had one isoform per gene, and lncRNA genes  
151 having more than 10 isoforms were less than 10 (**Figure 2C**). lncRNA loci possessed a slightly lower  
152 isoforms per gene than protein-coding gene. lncRNA had an average of 1.14 isoforms per gene locus,  
153 while protein-coding harbored 1.5 transcripts per gene. Shorter length, lower GC content, and less  
154 number of isoform per genes suggest that lncRNAs are less complex than protein-coding transcripts.

155 To examine the level of sequence conservation, we performed BLASTN of lncRNA transcripts  
156 against the genomes of closely related insects species namely *Ae. aegypti*, *C. quinquefasciatus*, *An.*  
157 *gambiae* and *D. melanogaster*. From BLASTN results, we defined conserved lncRNAs as transcripts  
158 having E-value less than  $10^{-50}$  (Etebari et al., 2016). Only 19 lncRNA transcripts were conserved in all  
159 4 genomes being tested, and most of the conserved lncRNAs (5,224 transcripts) shared high shared  
160 sequence similarity with *Ae. aegypti* genome. On the contrary, coding mRNAs showed higher level of  
161 sequence conservation by BLASTN (E-value  $< 10^{-50}$ ) method, as shown by the number of conserved  
162 transcripts shared in all genomes and the number of transcripts shared between *Ae. aegypti*  
163 (**Supplemental Figure 2**). Overall, total number of lncRNA transcripts that shared high sequence  
164 similarity with *Ae. aegypti* was significantly lower than that observed in mRNAs. For instance, only  
165 16% (5,224 out of 32,569 transcripts) of lncRNAs were highly conserved, but for coding mRNAs, 78%  
166 of their total transcripts (33,431 of 42,899 transcripts) exhibited high level of sequence conservation.

167

### 168 ***Ae. albopictus* lncRNAs may act as precursors for miRNAs and piRNAs**

169 In vertebrates, some lncRNAs were processed to generate miRNAs, showing that lncRNA  
170 transcripts act as precursors in miRNA biogenesis (Yoon et al., 2014; Zhang et al., 2018, 2017). To  
171 examine if this was also the case for *Ae. albopictus* lncRNAs, we examined lncRNA genomic  
172 coordinates that were fully overlapped with miRNA precursor loci. Due to the fact that miRNA  
173 annotation was not systematically done in *Ae. albopictus* C6/36 genome (canu\_80X\_arrow2.2  
174 assembly), we sought to produce comprehensive list of miRNAs by analyzing 20 public small RNA

175 datasets (accession: SRA060684 and SRP096579) using miRDeep2 software (Friedländer et al., 2012).  
176 We predicted a total of 116 and 10 known and novel miRNAs (**Supplemental Table 2**). We defined  
177 known miRNAs as those being already identified in previous reports (Batz et al., 2017; Gu et al.,  
178 2013), or sharing the same seed sequence to arthropod miRNAs reported in miRBase version 21.  
179 miRNAs that did not fall into any previously mentioned categories were defined as novel. By  
180 examining genomic coordinates of both lncRNAs and miRNAs, we found that 8 and 14 precursors  
181 miRNAs were fully overlapped with lncRNA loci on the same and opposite strand respectively  
182 (**Supplemental Table 3**). We classified these lncRNAs of having potential to be processed into  
183 functional mature miRNAs.

184 It was reported that *Ae. albopictus* was capable of producing piRNAs that were derived from  
185 protein-coding genes, suggesting that, beside TE silencing, piRNAs may possess other roles in  
186 biological pathways (Liu et al., 2016). Here, we extended the exploration of gene-derived piRNA by  
187 focusing on the piRNAs deriving from lncRNA loci. To explore this possibility, we aligned small RNA  
188 reads of 24-32 nt in size against lncRNA transcripts, and checked for the presence of typical piRNA  
189 characteristics such as 5'U bias and ping-pong signature, both of which represent hallmarks of piRNA  
190 characteristics conserved across all animal kingdom. Interestingly, we discovered that small RNA reads  
191 that aligned to lncRNAs displayed 5'U bias and ping-pong signature (**Figure 3**). The finding suggests  
192 that the biogenesis of lncRNA-derived piRNAs in *Ae. albopictus* involved both primary and secondary  
193 pathways; thereby, highlighting the possible role of piRNAs in the regulation of lncRNA expression.

194 piRNAs were mostly transcribed from genomic loci termed piRNA clusters, which are the  
195 sources of most piRNAs (Azlan et al., 2016; Siomi et al., 2011). Since our findings pointed out the  
196 possibility of lncRNAs producing piRNAs, we then asked if lncRNA loci were largely present within  
197 piRNA clusters. To answer this question, we first identified piRNA clusters in *Ae. albopictus* genome  
198 (canu\_80X\_arrow2.2 assembly) using proTRAC (Rosenkranz and Zischler, 2012), and subsequently  
199 discovered that the genome harbored a total of 385 clusters (**Supplemental Table 4**). Our analysis



200 revealed that the number of lncRNA transcripts intersecting with piRNA cluster loci was only 290, of  
201 which 160 of them were found to be fully overlapped with the clusters. The low number observed here  
202 implies that, the ability of lncRNAs serving as precursor for piRNA biogenesis is not directly due to  
203 their genomic location being present within piRNA clusters.

204

## 205 **Developmental expression of *Ae. albopictus* lncRNAs**

206 In other species, lncRNAs showed high tendency to be expressed in a development-specific  
207 fashion (Cabili et al., 2011; Chen et al., 2016; Nam and Bartel, 2012; Andrea Pauli et al., 2012). To  
208 investigate if this was also true in *Ae. albopictus* lncRNAs, we analyzed public dataset (accession:  
209 SRP055126) that provided transcriptome of seven developmental stages of *Ae. albopictus* that include  
210 0-24 and 24-48 embryonic stages, L1-L2 and L3-L4 larvae, pupae, adult males, and adult females.  
211 Consistent with findings reported in other species, across seven developmental stages, we observed that  
212 the overall expression of lncRNA was lower than protein-coding genes (**Figure 4A**).

213 To investigate the specificity of lncRNA expression, we compared for each gene the maximum  
214 expression among 7 developmental stages to the mean expression over the remaining 6 stages (Nam  
215 and Bartel, 2012). We repeated the same method with transcript-level expression of both lncRNA and  
216 protein-coding transcripts. By this metric, at transcript-level expression, lncRNAs were found to be  
217 more differentially expressed than mRNAs. Median fold difference between maximum and mean  
218 TPMs of lncRNAs and mRNAs were 2.4 and 0.96 respectively. On the contrary, at gene-level  
219 transcription, such difference was not observed, as median fold difference between maximum and  
220 mean TPMs of lncRNAs and coding genes were relatively similar – lncRNA was 2.4 and coding gene  
221 was 2.1.

222 To investigate the coexpression of lncRNAs in specific developmental stages, we conducted a  
223 hierarchical clustering analysis in Morpheus (<https://software.broadinstitute.org/morpheus>) based on  
224 Pearson correlation of z scores of each lncRNA (**Figure 5A**). We discovered that, compared to protein-

225 coding genes, vast majority of lncRNAs were more tightly clustered according to specific  
226 developmental stages. We further computed specificity score of each lncRNA using an entropy-based  
227 metric of Jensen-Shannon (JS) divergence as previously described (Cabali et al., 2011). The score  
228 ranges from zero for ubiquitously expressed genes, to one for genes specifically expressed in only one  
229 tissue. Based on this measure, lncRNAs displayed more specificity as 61% of them scored 1 while the  
230 fraction of protein-coding genes showing JS score of 1 was only 28%. Therefore, the results obtained  
231 here further corroborate previous findings that claimed lncRNAs in many species displayed higher  
232 tissue or stage-specific expression compared to that of protein-coding genes (Cabali et al., 2011; A.  
233 Pauli et al., 2012; Wu et al., 2016).

234 Previous reports showed that two neighboring genes have higher tendency to be coexpressed;  
235 thereby, showing strong correlation in expression levels (Cabali et al., 2011; Nam and Bartel, 2012;  
236 Ulitsky et al., 2011). We asked if lncRNAs in *Ae. albopictus* displayed correlation in expression  
237 between nearby or overlapping protein-coding genes that were located either on the same or opposite  
238 strand in the genome. We found that expression of the lncRNA and nearest protein-coding gene was  
239 correlated especially those within 1kb from each other, either on the same or opposite strand (Mean  
240 correlation of 0.4). As the distance increased up to 10kb, mean correlation between lncRNA and  
241 protein-coding genes lowered to around 0.2 (**Figure 5C**). Overlapping genes, on the other hand,  
242 showed less mean correlation than that of neighboring genes. Hence, this study showed that neighboring  
243 genes tended to show higher degree of expression correlation with lncRNAs than randomly assigned  
244 gene pairs

245

## 246 **lncRNAs were differentially expressed upon Flavivirus infection**

247 Studies on *Ae. aegypti* transcriptomes provided the evidence that lncRNAs could be involved in  
248 DENV and ZIKV-mosquito interaction. To examine if this was also the case in *Ae. albopictus*, we  
249 generated paired-end RNA-seq libraries derived from triplicates of C6/36 cells, larval-derived *Ae.*

250 *albopictus* cell line, infected with dengue virus serotype 1 (DENV1) and ZIKV. We combined both  
251 protein-coding genes and lncRNAs in our differential expression analysis using Salmon v0.9 (Patro et  
252 al., 2017) followed by edgeR (Robinson et al., 2010a). In general, we found that C6/36 cell  
253 transcriptome was highly responsive to both DENV1 and ZIKV infection. A total of 3,349 and 4,246  
254 genes were upregulated and downregulated respectively ( $|\log_2 \text{FC}| > 1$ ,  $\text{FDR} < 0.01$ ) upon DENV1  
255 infection (**Supplemental Table 6**). Of these genes, 1,360 and 379 of them were lncRNAs that were  
256 respectively upregulated and downregulated. Meanwhile, analysis of ZIKV-infected transcriptomes  
257 revealed a total of 3,677 upregulated genes ( $|\log_2 \text{FC}| > 1$ ,  $\text{FDR} < 0.01$ ), 1,115 of them were lncRNAs.  
258 We detected 3,979 genes (2,698 were lncRNAs) were downregulated upon ZIKV infection in C6/36  
259 cells.

260 Distribution of fold change showed that upon DENV1 infection, protein-coding gene and  
261 lncRNA experienced somewhat similar level of differential expression (**Figure 6A**). Mean fold change  
262 of protein coding gene and lncRNA following DENV infection was 1.71 and 1.70 respectively.  
263 Meanwhile, in ZIKV-infected transcriptome, we discovered that mean fold change of lncRNA was  
264 higher than protein-coding gene (**Figure 6A**). For instance, lncRNA average fold change was 3.26  
265 while protein-coding was 1.92 upon ZIKV infection. The discrepancy observed here suggest that  
266 different virus may elicit different transcriptional responses to the host cells. Besides, the observation  
267 that lncRNAs had different transcriptional response than protein-coding gene especially in ZIKV  
268 transcriptome raised the possibility that differential expression of lncRNAs was not necessarily due to  
269 the co-expression with their neighboring protein-coding genes.

270 To investigate this possibility, we looked for protein-coding genes located closest to  
271 differentially expressed lncRNA loci, and examined how many of them having significant differential  
272 expression. We discovered that the number of differentially expressed protein-coding genes residing in  
273 close proximity to differentially expressed lncRNA was low. For example, in DENV transcriptome,  
274 only 225 out of 5,858 differentially expressed protein-coding genes were located closely to

275 differentially expressed lncRNA, while in ZIKV, the number was 205 out of 3,803. Therefore, the  
276 findings further substantiate the idea that change in lncRNA transcriptional expression landscape  
277 following virus infection was not just a byproduct of the neighboring protein-coding genes.

278 We detected a total of 2,071 genes that were differentially expressed in both DENV and  
279 ZIKV-infected cell transcriptomes. Of 2,071 genes, 717 of them were lncRNAs. We noticed that,  
280 compared to 2,071 genes, the number of genes that were both upregulated and downregulated in ZIKV  
281 and DENV were less than the number of genes having differential expression in opposite direction.  
282 Total number of lncRNA genes having opposite fold change in DENV and ZIKV infected  
283 transcriptomes was 506, while for protein-coding genes, the number was 905. This further support the  
284 notion that different virus evokes different transcriptional responses within the same host. Flavivirus  
285 infected transcriptome data generated in this study was limited to *Ae. albopictus* C6/36 cell line. Thus,  
286 to investigate whether the findings reported here were also true in adult *Ae. albopictus* mosquitoes, we  
287 analyzed available RNA-seq dataset on *Ae. albopictus* infected with DENV (Tsujiimoto et al., 2017),  
288 and the results showed that the overall pattern of transcriptional response especially lncRNAs upon  
289 virus infection was similar regardless of tissue or cell types (**Supplemental Figure 3**).

290 We realized that our virus-infected transcriptomes were valuable for identifying important  
291 pathways involved in flavivirus infection. Because our main focus was to study lncRNAs, pathways  
292 and gene ontology analysis of differentially expressed protein-coding genes were not discussed here.  
293 Gene ontology analysis can be found in **Supplemental Figure 4**.

294

## 295 **Discussion**

296 *Ae. albopictus*, a vector of several viruses such as DENV, ZIKV, and CHIKV, is a highly  
297 invasive species that thrives in temperate and tropical regions (Chen et al., 2015; Paupy et al., 2009).  
298 Genomic and transcriptomic investigation of *Ae. albopictus* should provide valuable genetic resources  
299 that will inform the biology of this mosquito especially on its competency as a successful vector. With

300 this in mind, we performed global *de novo* annotation of lncRNA using RNA-seq data generated in this  
301 study and publicly available datasets. In this study, we have generated the first systematic annotation of  
302 *Ae. albopictus* transcriptome focusing primarily on lncRNAs. Huge number of sequencing reads with  
303 deep coverage enabled us to reconstruct high-confidence 23,899 lncRNA transcripts in *Ae. albopictus*.  
304 In parallel to its genome being the largest mosquito genome sequenced to date, to our knowledge, the  
305 number *Ae. albopictus* lncRNAs annotated in this study is the largest compared to other insects such as  
306 *Ae. aegypti*, *D. melanogaster*, and *An. gambiae* (Chen et al., 2015; Miller et al., 2018). Large genome  
307 size feature enables *Ae. albopictus* to harbor great numbers of lncRNA genes, which possibly  
308 contribute genetic materials for successful adaptation following selection in new environments (Chen et  
309 al., 2015).

310 Currently, three versions of *Ae. albopictus* genomes have been released – Foshan strain, AaloF1  
311 (Chen et al., 2015), Rimini strain, AalbR1 (Dritsou et al., 2015), and C6/36, canu\_80X\_arrow2.2  
312 (Miller et al., 2018). Due to small contigs and limited gene annotation of AalbR1 assembly, we only  
313 considered to use either canu\_80X\_arrow2.2 or AaloF1 assembly in this study. AaloF1 assembly was  
314 generated using Illumina platform while canu\_80X\_arrow2.2 was sequenced using PacBio technology.  
315 Due to deep coverage of long-read sequencing by PacBio technology, canu\_80X\_arrow2.2 assembly  
316 has larger contigs than any previously assembled mosquito genome (Miller et al., 2018); hence,  
317 offering advantage of identifying complete gene sequences. For that reason, we finally decided to use  
318 canu\_80X\_arrow2.2 assembly for lncRNA annotation.

319 Analysis of the characteristics of lncRNA in *Ae. albopictus* revealed that, despite having low  
320 level of sequence conservation among closely related insect species, lncRNAs shared strikingly similar  
321 genomic features with other species including invertebrates and vertebrates. *Ae. albopictus* lncRNAs  
322 shared many of the characteristics of their vertebrates counterparts (Hezroni et al., 2015; Andrea Pauli  
323 et al., 2012): short transcript length, relatively low expression, low level of sequence conservation, low  
324 number of isoforms, higher proportion of repeat-embedded nucleotides, low GC contents, and tend to

325 be coexpressed with neighboring protein-coding genes. Developmental profile of transcript-level  
326 expression showed that lncRNA transcripts were more differentially expressed than mRNAs. However,  
327 this was not the case when the same analysis was performed at gene-level expression. This observation  
328 highlights the possibility that *Ae. albopictus* lncRNAs undergo active alternative splicing throughout  
329 the development, and certain isoforms are required in specific developmental stages.

330 Besides, lncRNAs are expressed in developmental-specific manner, and the degree of  
331 specificity is much higher than protein-coding genes. The association of specific sets of lncRNAs with  
332 well-defined developmental stage and sex, suggest that *Ae. albopictus* lncRNAs possess various roles  
333 in development. In addition, we observed that lncRNAs expressed during 0-24 hour and 24-48 hour  
334 embryo were clustered closer together, suggesting that these early embryonic lncRNAs might regulate  
335 same set of functions in embryogenesis. We also noticed that lncRNAs might have the potential to act  
336 as precursors to mature miRNAs and piRNAs, suggesting that lncRNAs are accessible to AGO/PIWI  
337 and other proteins responsible for small RNA biogenesis. Interestingly, the discovery that piRNA  
338 deriving from lncRNA transcripts was among the first to be documented. Based on the piRNA  
339 hallmarks features (5'U bias and ping-pong signature) found specifically in lncRNA-derived piRNAs,  
340 we proposed that piRNAs in *Ae. albopictus*, besides TE silencing, they might be involved in the  
341 regulation of lncRNAs.

342 This study also showed that genome-wide expression of lncRNAs were altered upon DENV and  
343 ZIKV infection. In line with previous studies done in mammale and *Ae. aegypti* (Etebari et al., 2017,  
344 2016; Zhao et al., 2018), alteration of lncRNA expression landscape following flavivirus infection  
345 observed in this study implicates the involvement of *Ae. albopictus* lncRNAs in virus-host interaction.  
346 Besides, our virus-infected transcriptome analysis also revealed that, similar to other well-studied  
347 organisms (Batut and Gingeras, 2017; Engreitz et al., 2016), *Ae. albopictus* lncRNAs presumably  
348 possess their own regulatory elements that specifically govern their expression in response to viral-  
349 infection, independent of the neighboring protein-coding genes.

350 In summary, our study provides the first comprehensive catalog of *Ae. albopictus* lncRNA. This  
351 study also offer glimpse into lncRNA functions in numerous processes including development and  
352 virus-host response. Results generated in this study provides high-quality resources for future  
353 investigation on lncRNA functions in mosquito vectors.

354

## 355 **Materials and Methods**

### 356 **Cell culture and virus**

357 *Ae. albopictus* C6/36 cell (ATCC: CRL-1660) were cultured in Leibovitz's L-15 medium (Gibco,  
358 41300039), supplemented with 10% Fetal Bovine Serum (FBS, Gibco, 10270) and 10% Tryptose  
359 Phosphate Broth (TPB) solution (Sigma, T9157). C6/36 cells were incubated at 25°C without CO<sub>2</sub>.  
360 BHK-21 cells (ATCC: CCL-10) were cultured at 37°C in Dulbecco's modified Eagles Medium  
361 (DMEM, Gibco, 11995065) supplemented with 10% FBS (Gibco, 10270), and 5% CO<sub>2</sub>. Dengue virus  
362 serotype 1 (Hawaiian strain) and Zika virus (Strain H/PF/2013), were propagated in C6/36 cells and  
363 titered using BHK-21 cells. Determination of DENV1 titer was done using 50% tissue culture  
364 infectious dose – cytopathic effect (TCID<sub>50</sub>-CPE) as previously described (Li et al., 2011; Atieh et al.,  
365 2016). DENV1 used in this study was a gift from Dr. David Perera, University Malaysia Sarawak.  
366 ZIKV used in this study was a gift from Dr Shee Mei Lok, Duke-NUS Medical School, Singapore.

367

### 368 **Virus infection, RNA extraction and sequencing**

369 C6/36 cells were infected with DENV1 and ZIKV at multiplicity of infection (MOI) of 0.25. After 3  
370 day post infection, RNA extraction was carried out using miRNeasy Mini Kit 50 (Qiagen, 217004)  
371 according to the manufacturer's protocol. Total RNA was then subjected to next-generation sequencing.  
372 The RNA-sequencing libraries were prepared using standard Illumina protocols and sequenced using  
373 HiSeq2500 platform generating paired-end reads of 150 in size.

374

## 375 **Preparation of public datasets**

376 Publicly available long RNA-seq datasets were downloaded from NCBI Sequence Reads Archive  
377 (SRA). List of public datasets can be found in **Supplemental Table 1**. Prior to downstream analyses,  
378 RNA-seq adapters were clipped using Trimmomatic version 0.38 (Bolger et al., 2014), and low quality  
379 reads were removed.

380

## 381 **Identification of lncRNA**

382 RNA-seq libraries were mapped against *Ae. albopictus* genome (assembly: canu\_80X\_arrow2.2, strain:  
383 C6/36, VectorBase) using HISAT2 version 2.1.0 (Kim et al., 2015). Stringtie version 1.3.2 (Pertea et  
384 al., 2015) was used to assemble transcript, allowing the assembly of potential novel transcripts. A  
385 minimum of 200 bp size was set for transcript assembly. The resulting gtf files were merged into a  
386 using Stringtie merge, and we only retained transcripts having FPKM and RPKM of more than 0.5.  
387 Gffcompare (<https://github.com/gpertea/gffcompare>) was used to annotate and compare novel  
388 transcripts with the reference annotation. Transcripts with class code “i”, “u”, and “x” were retained for  
389 downstream analysis. We performed initial filtering of transcripts having coding potential using  
390 TransDecoder (Haas et al., 2013). We then evaluated further the coding potential of the remaining  
391 transcripts using CPAT (Wang et al., 2013), CPC2 (Kang et al., 2017), and CNCI (Sun et al., 2013). We  
392 applied cut-off of less than 0.3 for CPAT, and less than 0 for both CPC2, and CNCI. Only transcripts  
393 that passed the cut-off of all three softwares were retained. To exclude false positive prediction, we  
394 used BLASTX against Swissprot database, and transcripts having E-value of less than  $10^{-5}$  were  
395 removed. We then discarded transcripts without genomic strand information.

396

## 397 **Differential expression and functional annotation**

398 Salmon version Salmon v0.9 was used to quantify gene expression (Patro et al., 2017). Differential  
399 expression analysis was done using edgeR (Robinson et al., 2010b) in R/Bioconductor environment.



400 Functional annotation was done using DAVID 6.8 (Huang et al., 2009a, 2009b) Briefly, differentially  
401 expressed transcripts were ‘BLASTX’ed against *Ae. aegypti* peptide reference (Vectorbase) with  
402 parameter of E-value < 10<sup>-3</sup>. The *Ae. aegypti* gene IDs were used as input in DAVID 6.8.

403

#### 404 **miRNA identification**

405 Analysis of miRNA discovery and expression levels were performed using the miRDeep2 v2.0.0.8  
406 (Friedländer et al., 2012). Precursor miRNAs within the arthropod family (retrieved from miRBase  
407 version 21) were used as sequence templates of the related species (Miesen et al., 2016a). After  
408 prediction, we set two thresholds: (1) a significant Randfold p-value (p-value < 0.05) predicted  
409 Randfold v2.0.1 (Bonnet et al., 2004) for precursor miRNAs, and (2) the lowest miRDeep2 score cutoff  
410 (4.0) that had highest signal-to-noise ratio (4.5) (Ikeda et al., 2015) Predicted miRNAs that share the  
411 same homology and seed sequence with annotated miRNAs in miRBase (version 21) were categorized  
412 as homologous miRNAs, while those that do not share any sequence homology were putatively novel  
413 miRNAs.

414

#### 415 **piRNA identification**

416 Reads mapped to known ncRNA (snoRNAs, rRNAs, tRNAs, miscRNAs, and previously identified  
417 miRNAs) in *Ae. albopictus* were removed. Sequence of non-coding RNAs (except miRNAs) were  
418 curated from NCBI and VectorBase. The unaligned reads were considered as unannotated, and they  
419 were filtered to 24-34 nt in size. Filtered reads were then checked for the presence of 5’U bias and  
420 ping-pong signature. Ping-pong signature and 5’U bias were analyzed using perl script provided in  
421 NGS toolbox (Rosenkranz et al., 2015). Prediction of piRNA clusters was performed using proTRAC  
422 v2.4 with default settings (Rosenkranz and Zischler, 2012).

423

424

425 **Acknowledgements**

426 We would like to thank all our collaborators and colleagues for the discussion and the work conducted  
427 in this lab. This study was funded by the USM Research University Grant (1001/PBIOLOGI/811320)  
428 and Sciencefund (305/PBIOLOGI/613238).

429

430 **Figure 1** lncRNA identification pipeline

431 **Figure 2** Characterization of *Ae. albopictus* lncRNA

432 **Figure 3** lncRNA-derived piRNA

433 **Figure 4** Developmental expression of *Ae. albopictus* lncRNA

434 **Figure 5** Stage-specific expression lncRNA and correlation with protein-coding gene

435 **Figure 6** Differential expression of lncRNA upon DENV1 and ZIKV infection

436 **Supplemental Figure 1** Coding probability computed by CPAT and CPC2

437 **Supplemental Figure 2** Conservation of *Ae. albopictus* lncRNA

438 **Supplemental Figure 3** Differential expression of lncRNAs in midgut and carcass infected with  
439 dengue virus serotype 2 (DENV2) from Tsujimoto et al. 2017

440 **Supplemental Figure 4** Gene ontology analysis of protein-coding genes that were differentially  
441 expressed in DENV1 and ZIKV-infected C6/36 cells.

442 **Supplemental Data 1** lncRNA annotation in GTF format

443 **Supplemental Table 1** List of accession of public datasets used in this study

444 **Supplemental Table 2** Genomic coordinates of miRNA identified in this study

445 **Supplemental Table 3** lncRNA overlapping miRNA precursors

446 **Supplemental Table 4** piRNA clusters

447 **Supplemental Table 5** List of differentially expressed lncRNA and protein-coding genes in DENV1  
448 and ZIKV-infected C6/36 cells

449 **Supplemental Table 6** List of differentially expressed lncRNA in midgut and carcass infected with  
450 dengue virus serotype 2 (DENV2) from Tsujimoto et al. 2017

451 **Supplemental Table 7** KEGG pathway analysis of the differentially expressed protein-coding genes in  
452 DENV1 and ZIKV-infected C6/36 cells

453

## 454 **References**

- Atieh, T., Baronti, C., de Lamballerie, X., Nougairède, A., 2016. Simple reverse genetics systems for Asian and African Zika viruses. *Sci. Rep.* 6. <https://doi.org/10.1038/srep39384>
- Azlan, A., Dzaki, N., Azzam, G., 2016. Argonaute: The executor of small RNA function. *J. Genet. Genomics* 43, 481–494. <https://doi.org/10.1016/j.jgg.2016.06.002>
- Azlan, A., Obeidat, S.M., Yunus, M.A., Azzam, G., 2018. Transcriptome profiles and novel lncRNA identification of *Aedes aegypti* cells in response to dengue virus serotype 1. *bioRxiv* 422170. <https://doi.org/10.1101/422170>
- Batut, P.J., Gingeras, T.R., 2017. Conserved noncoding transcription and core promoter regulatory code in early *Drosophila* development. *eLife* 6, e29005. <https://doi.org/10.7554/eLife.29005>
- Batz, Z.A., Goff, A.C., Armbruster, P.A., 2017. MicroRNAs are differentially abundant during *Aedes albopictus* diapause maintenance but not diapause induction. *Insect Mol. Biol.* 26, 721–733. <https://doi.org/10.1111/imb.12332>
- Bolger, A.M., Lohse, M., Usadel, B., 2014. Trimmomatic: a flexible trimmer for Illumina sequence data. *Bioinforma. Oxf. Engl.* 30, 2114–2120. <https://doi.org/10.1093/bioinformatics/btu170>
- Bonnet, E., Wuyts, J., Rouzé, P., Van de Peer, Y., 2004. Evidence that microRNA precursors, unlike other non-coding RNAs, have lower folding free energies than random sequences. *Bioinforma. Oxf. Engl.* 20, 2911–2917. <https://doi.org/10.1093/bioinformatics/bth374>
- Brennecke, J., Aravin, A.A., Stark, A., Dus, M., Kellis, M., Sachidanandam, R., Hannon, G.J., 2007. Discrete Small RNA-Generating Loci as Master Regulators of Transposon Activity in *Drosophila*. *Cell* 128, 1089–1103. <https://doi.org/10.1016/j.cell.2007.01.043>
- Cabili, M.N., Trapnell, C., Goff, L., Koziol, M., Tazon-Vega, B., Regev, A., Rinn, J.L., 2011. Integrative annotation of human large intergenic noncoding RNAs reveals global properties and specific subclasses. *Genes Dev.* 25, 1915–1927. <https://doi.org/10.1101/gad.17446611>
- Chen, B., Zhang, Y., Zhang, X., Jia, S., Chen, S., Kang, L., 2016. Genome-wide identification and developmental expression profiling of long noncoding RNAs during *Drosophila* metamorphosis. *Sci. Rep.* 6, 23330. <https://doi.org/10.1038/srep23330>
- Chen, X.-G., Jiang, Xuanting, Gu, J., Xu, M., Wu, Y., Deng, Y., Zhang, C., Bonizzoni, M., Dermauw, W., Vontas, J., Armbruster, P., Huang, X., Yang, Y., Zhang, H., He, W., Peng, H., Liu, Y., Wu, K., Chen, J., Lirakis, M., Topalis, P., Leeuwen, T.V., Hall, A.B., Jiang, Xiaofang, Thorpe, C., Mueller, R.L., Sun, C., Waterhouse, R.M., Yan, G., Tu, Z.J., Fang, X., James, A.A., 2015. Genome sequence of the Asian Tiger mosquito, *Aedes albopictus*, reveals insights into its biology, genetics, and evolution. *Proc. Natl. Acad. Sci.* 112, E5907–E5915. <https://doi.org/10.1073/pnas.1516410112>
- Dritsou, V., Topalis, P., Windbichler, N., Simoni, A., Hall, A., Lawson, D., Hinsley, M., Hughes, D., Napolioni, V., Crucianelli, F., Deligianni, E., Gasperi, G., Gomulski, L.M., Savini, G., Manni, M., Scolari, F., Malacrida, A.R., Arcà, B., Ribeiro, J.M., Lombardo, F., Saccone, G., Salvemini, M., Moretti, R., Aprea, G., Calvitti, M., Picciolini, M., Papathanos, P.A., Spaccapelo, R., Favia,

- G., Crisanti, A., Louis, C., 2015. A draft genome sequence of an invasive mosquito: an Italian *Aedes albopictus*. *Pathog. Glob. Health* 109, 207–220.  
<https://doi.org/10.1179/2047773215Y.0000000031>
- Engreitz, J.M., Haines, J.E., Perez, E.M., Munson, G., Chen, J., Kane, M., McDonel, P.E., Guttman, M., Lander, E.S., 2016. Local regulation of gene expression by lncRNA promoters, transcription and splicing. *Nature* 539, 452–455. <https://doi.org/10.1038/nature20149>
- Etebari, K., Asad, S., Zhang, G., Asgari, S., 2016. Identification of *Aedes aegypti* Long Intergenic Non-coding RNAs and Their Association with Wolbachia and Dengue Virus Infection. *PLoS Negl. Trop. Dis.* 10, e0005069. <https://doi.org/10.1371/journal.pntd.0005069>
- Etebari, K., Hegde, S., Saldaña, M.A., Widen, S.G., Wood, T.G., Asgari, S., Hughes, G.L., 2017. Global Transcriptome Analysis of *Aedes aegypti* Mosquitoes in Response to Zika Virus Infection. *mSphere* 2, e00456-17. <https://doi.org/10.1128/mSphere.00456-17>
- Friedländer, M.R., Mackowiak, S.D., Li, N., Chen, W., Rajewsky, N., 2012. miRDeep2 accurately identifies known and hundreds of novel microRNA genes in seven animal clades. *Nucleic Acids Res.* 40, 37–52. <https://doi.org/10.1093/nar/gkr688>
- Gu, J., Hu, W., Wu, J., Zheng, P., Chen, M., James, A.A., Chen, X., Tu, Z., 2013. miRNA Genes of an Invasive Vector Mosquito, *Aedes albopictus*. *PLOS ONE* 8, e67638.  
<https://doi.org/10.1371/journal.pone.0067638>
- Haas, B.J., Papanicolaou, A., Yassour, M., Grabherr, M., Blood, P.D., Bowden, J., Couger, M.B., Eccles, D., Li, B., Lieber, M., MacManes, M.D., Ott, M., Orvis, J., Pochet, N., Strozzi, F., Weeks, N., Westerman, R., William, T., Dewey, C.N., Henschel, R., LeDuc, R.D., Friedman, N., Regev, A., 2013. De novo transcript sequence reconstruction from RNA-Seq: reference generation and analysis with Trinity. *Nat. Protoc.* 8. <https://doi.org/10.1038/nprot.2013.084>
- Hezroni, H., Koppstein, D., Schwartz, M.G., Avrutin, A., Bartel, D.P., Ulitsky, I., 2015. Principles of Long Noncoding RNA Evolution Derived from Direct Comparison of Transcriptomes in 17 Species. *Cell Rep.* 11, 1110–1122. <https://doi.org/10.1016/j.celrep.2015.04.023>
- Huang, D.W., Sherman, B.T., Lempicki, R.A., 2009a. Systematic and integrative analysis of large gene lists using DAVID bioinformatics resources. *Nat. Protoc.* 4, 44–57.  
<https://doi.org/10.1038/nprot.2008.211>
- Huang, D.W., Sherman, B.T., Lempicki, R.A., 2009b. Bioinformatics enrichment tools: paths toward the comprehensive functional analysis of large gene lists. *Nucleic Acids Res.* 37, 1–13.  
<https://doi.org/10.1093/nar/gkn923>
- Ikeda, K.T., Hirose, Y., Hiraoka, K., Noro, E., Fujishima, K., Tomita, M., Kanai, A., 2015. Identification, expression, and molecular evolution of microRNAs in the “living fossil” *Triops cancriformis* (tadpole shrimp). *RNA* 21, 230–242. <https://doi.org/10.1261/rna.045799.114>
- Kang, Y.-J., Yang, D.-C., Kong, L., Hou, M., Meng, Y.-Q., Wei, L., Gao, G., 2017. CPC2: a fast and accurate coding potential calculator based on sequence intrinsic features. *Nucleic Acids Res.* 45, W12–W16. <https://doi.org/10.1093/nar/gkx428>
- Kim, D., Langmead, B., Salzberg, S.L., 2015. HISAT: a fast spliced aligner with low memory requirements. *Nat. Methods* 12, 357–360. <https://doi.org/10.1038/nmeth.3317>
- Li, J., Hu, D., Ding, X., Chen, Y., Pan, Y., Qiu, L., Che, X., 2011. Enzyme-Linked Immunosorbent Assay-Format Tissue Culture Infectious Dose-50 Test for Titrating Dengue Virus. *PLOS ONE* 6, e22553. <https://doi.org/10.1371/journal.pone.0022553>
- Liu, P., Dong, Y., Gu, J., Puthiyakunnon, S., Wu, Y., Chen, X.-G., 2016. Developmental piRNA profiles of the invasive vector mosquito *Aedes albopictus*. *Parasit. Vectors* 9, 524.  
<https://doi.org/10.1186/s13071-016-1815-8>
- Liu, Y., Zhou, Y., Wu, J., Zheng, P., Li, Y., Zheng, X., Puthiyakunnon, S., Tu, Z., Chen, X.-G., 2015. The expression profile of *Aedes albopictus* miRNAs is altered by dengue virus serotype-2 infection. *Cell Biosci.* 5. <https://doi.org/10.1186/s13578-015-0009-y>

- Mallory, A., Vaucheret, H., 2010. Form, Function, and Regulation of ARGONAUTE Proteins. *Plant Cell* 22, 3879–3889. <https://doi.org/10.1105/tpc.110.080671>
- Miesen, P., Ivens, A., Buck, A.H., Rij, R.P. van, 2016a. Small RNA Profiling in Dengue Virus 2-Infected Aedes Mosquito Cells Reveals Viral piRNAs and Novel Host miRNAs. *PLoS Negl. Trop. Dis.* 10, e0004452. <https://doi.org/10.1371/journal.pntd.0004452>
- Miesen, P., Joosten, J., Rij, R.P. van, 2016b. PIWIs Go Viral: Arbovirus-Derived piRNAs in Vector Mosquitoes. *PLOS Pathog.* 12, e1006017. <https://doi.org/10.1371/journal.ppat.1006017>
- Miller, J.R., Koren, S., Dilley, K.A., Puri, V., Brown, D.M., Harkins, D.M., Thibaud-Nissen, F., Rosen, B., Chen, X.-G., Tu, Z., Sharakhov, I.V., Sharakhova, M.V., Sebra, R., Stockwell, T.B., Bergman, N.H., Sutton, G.G., Phillippy, A.M., Piermarini, P.M., Shabman, R.S., 2018. Analysis of the Aedes albopictus C6/36 genome provides insight into cell line utility for viral propagation. *GigaScience* 7. <https://doi.org/10.1093/gigascience/gix135>
- Nam, J.-W., Bartel, D.P., 2012. Long noncoding RNAs in C. elegans. *Genome Res.* 22, 2529–2540. <https://doi.org/10.1101/gr.140475.112>
- Patro, R., Duggal, G., Love, M.I., Irizarry, R.A., Kingsford, C., 2017. Salmon: fast and bias-aware quantification of transcript expression using dual-phase inference. *Nat. Methods* 14, 417–419. <https://doi.org/10.1038/nmeth.4197>
- Pauli, A., Valen, E., Lin, M.F., Garber, M., Vastenhouw, N.L., Levin, J.Z., Fan, L., Sandelin, A., Rinn, J.L., Regev, A., Schier, A.F., 2012. Systematic identification of long noncoding RNAs expressed during zebrafish embryogenesis. *Genome Res.* 22, 577–591. <https://doi.org/10.1101/gr.133009.111>
- Pauli, Andrea, Valen, E., Lin, M.F., Garber, M., Vastenhouw, N.L., Levin, J.Z., Fan, L., Sandelin, A., Rinn, J.L., Regev, A., Schier, A.F., 2012. Systematic identification of long noncoding RNAs expressed during zebrafish embryogenesis. *Genome Res.* 22, 577–591. <https://doi.org/10.1101/gr.133009.111>
- Paupy, C., Delatte, H., Bagny, L., Corbel, V., Fontenille, D., 2009. Aedes albopictus, an arbovirus vector: From the darkness to the light. *Microbes Infect., Forum on Chikungunya* 11, 1177–1185. <https://doi.org/10.1016/j.micinf.2009.05.005>
- Pertea, M., Pertea, G.M., Antonescu, C.M., Chang, T.-C., Mendell, J.T., Salzberg, S.L., 2015. StringTie enables improved reconstruction of a transcriptome from RNA-seq reads. *Nat. Biotechnol.* 33, 290–295. <https://doi.org/10.1038/nbt.3122>
- Robinson, M.D., McCarthy, D.J., Smyth, G.K., 2010a. edgeR: a Bioconductor package for differential expression analysis of digital gene expression data. *Bioinformatics* 26, 139–140. <https://doi.org/10.1093/bioinformatics/btp616>
- Robinson, M.D., McCarthy, D.J., Smyth, G.K., 2010b. edgeR: a Bioconductor package for differential expression analysis of digital gene expression data. *Bioinformatics* 26, 139–140. <https://doi.org/10.1093/bioinformatics/btp616>
- Rosenkranz, D., Han, C.-T., Roovers, E.F., Zischler, H., Ketting, R.F., 2015. Piwi proteins and piRNAs in mammalian oocytes and early embryos: From sample to sequence. *Genomics Data* 5, 309–313. <https://doi.org/10.1016/j.gdata.2015.06.026>
- Rosenkranz, D., Zischler, H., 2012. proTRAC - a software for probabilistic piRNA cluster detection, visualization and analysis. *BMC Bioinformatics* 13, 5. <https://doi.org/10.1186/1471-2105-13-5>
- Siomi, M.C., Sato, K., Pezic, D., Aravin, A.A., 2011. PIWI-interacting small RNAs: the vanguard of genome defence. *Nat. Rev. Mol. Cell Biol.* 12, 246–258. <https://doi.org/10.1038/nrm3089>
- Sun, L., Luo, H., Bu, D., Zhao, G., Yu, K., Zhang, C., Liu, Y., Chen, R., Zhao, Y., 2013. Utilizing sequence intrinsic composition to classify protein-coding and long non-coding transcripts. *Nucleic Acids Res.* 41, e166–e166. <https://doi.org/10.1093/nar/gkt646>
- Trapnell, C., Williams, B.A., Pertea, G., Mortazavi, A., Kwan, G., Baren, M.J. van, Salzberg, S.L., Wold, B.J., Pachter, L., 2010. Transcript assembly and quantification by RNA-Seq reveals

- unannotated transcripts and isoform switching during cell differentiation. *Nat. Biotechnol.* 28, 511–515. <https://doi.org/10.1038/nbt.1621>
- Tripathi, V., Ellis, J.D., Shen, Z., Song, D.Y., Pan, Q., Watt, A.T., Freier, S.M., Bennett, C.F., Sharma, A., Bubulya, P.A., Blencowe, B.J., Prasanth, S.G., Prasanth, K.V., 2010. The Nuclear-Retained Noncoding RNA MALAT1 Regulates Alternative Splicing by Modulating SR Splicing Factor Phosphorylation. *Mol. Cell* 39, 925–938. <https://doi.org/10.1016/j.molcel.2010.08.011>
- Tsujimoto, H., Hanley, K.A., Sundararajan, A., Devitt, N.P., Schilkey, F.D., Hansen, I.A., 2017. Dengue virus serotype 2 infection alters midgut and carcass gene expression in the Asian tiger mosquito, *Aedes albopictus*. *PLOS ONE* 12, e0171345. <https://doi.org/10.1371/journal.pone.0171345>
- Ulitsky, I., Bartel, D.P., 2013. lincRNAs: Genomics, Evolution, and Mechanisms. *Cell* 154, 26–46. <https://doi.org/10.1016/j.cell.2013.06.020>
- Ulitsky, I., Shkumatava, A., Jan, C.H., Sive, H., Bartel, D.P., 2011. Conserved Function of lincRNAs in Vertebrate Embryonic Development despite Rapid Sequence Evolution. *Cell* 147, 1537–1550. <https://doi.org/10.1016/j.cell.2011.11.055>
- Wang, K.C., Yang, Y.W., Liu, B., Sanyal, A., Corces-Zimmerman, R., Chen, Y., Lajoie, B.R., Protacio, A., Flynn, R.A., Gupta, R.A., Wysocka, J., Lei, M., Dekker, J., Helms, J.A., Chang, H.Y., 2011. A long noncoding RNA maintains active chromatin to coordinate homeotic gene expression. *Nature* 472, 120–124. <https://doi.org/10.1038/nature09819>
- Wang, L., Park, H.J., Dasari, S., Wang, S., Kocher, J.-P., Li, W., 2013. CPAT: Coding-Potential Assessment Tool using an alignment-free logistic regression model. *Nucleic Acids Res.* 41, e74. <https://doi.org/10.1093/nar/gkt006>
- Wang, Z., Gerstein, M., Snyder, M., 2009. RNA-Seq: a revolutionary tool for transcriptomics. *Nat. Rev. Genet.* 10, 57–63. <https://doi.org/10.1038/nrg2484>
- Wilhelm, B.T., Marguerat, S., Goodhead, I., Bähler, J., 2010. Defining transcribed regions using RNA-seq. *Nat. Protoc.* 5, 255–266. <https://doi.org/10.1038/nprot.2009.229>
- Wu, Y., Cheng, T., Liu, C., Liu, D., Zhang, Q., Long, R., Zhao, P., Xia, Q., 2016. Systematic Identification and Characterization of Long Non-Coding RNAs in the Silkworm, *Bombyx mori*. *PLOS ONE* 11, e0147147. <https://doi.org/10.1371/journal.pone.0147147>
- Yoon, J.-H., Abdelmohsen, K., Gorospe, M., 2014. Functional interactions among microRNAs and long noncoding RNAs. *Semin. Cell Dev. Biol.* 0, 9–14. <https://doi.org/10.1016/j.semcdb.2014.05.015>
- Young, R.S., Marques, A.C., Tibbit, C., Haerty, W., Bassett, A.R., Liu, J.-L., Ponting, C.P., 2012. Identification and Properties of 1,119 Candidate LincRNA Loci in the *Drosophila melanogaster* Genome. *Genome Biol. Evol.* 4, 427–442. <https://doi.org/10.1093/gbe/evs020>
- Zhang, J., Wei, L., Jiang, J., Mason, A.S., Li, H., Cui, C., Chai, L., Zheng, B., Zhu, Y., Xia, Q., Jiang, L., Fu, D., 2018. Genome-wide identification, putative functionality and interactions between lincRNAs and miRNAs in Brassica species. *Sci. Rep.* 8, 4960. <https://doi.org/10.1038/s41598-018-23334-1>
- Zhang, Y., Li, Y., Wang, Q., Zhang, X., Wang, D., Tang, H.C., Meng, X., Ding, X., 2017. Identification of an lincRNA-miRNA-mRNA interaction mechanism in breast cancer based on bioinformatic analysis. *Mol. Med. Rep.* 16, 5113. <https://doi.org/10.3892/mmr.2017.7304>
- Zhao, P., Liu, S., Zhong, Z., Jiang, T., Weng, R., Xie, M., Yang, S., Xia, X., 2018. Analysis of expression profiles of long noncoding RNAs and mRNAs in brains of mice infected by rabies virus by RNA sequencing. *Sci. Rep.* 8, 11858. <https://doi.org/10.1038/s41598-018-30359-z>

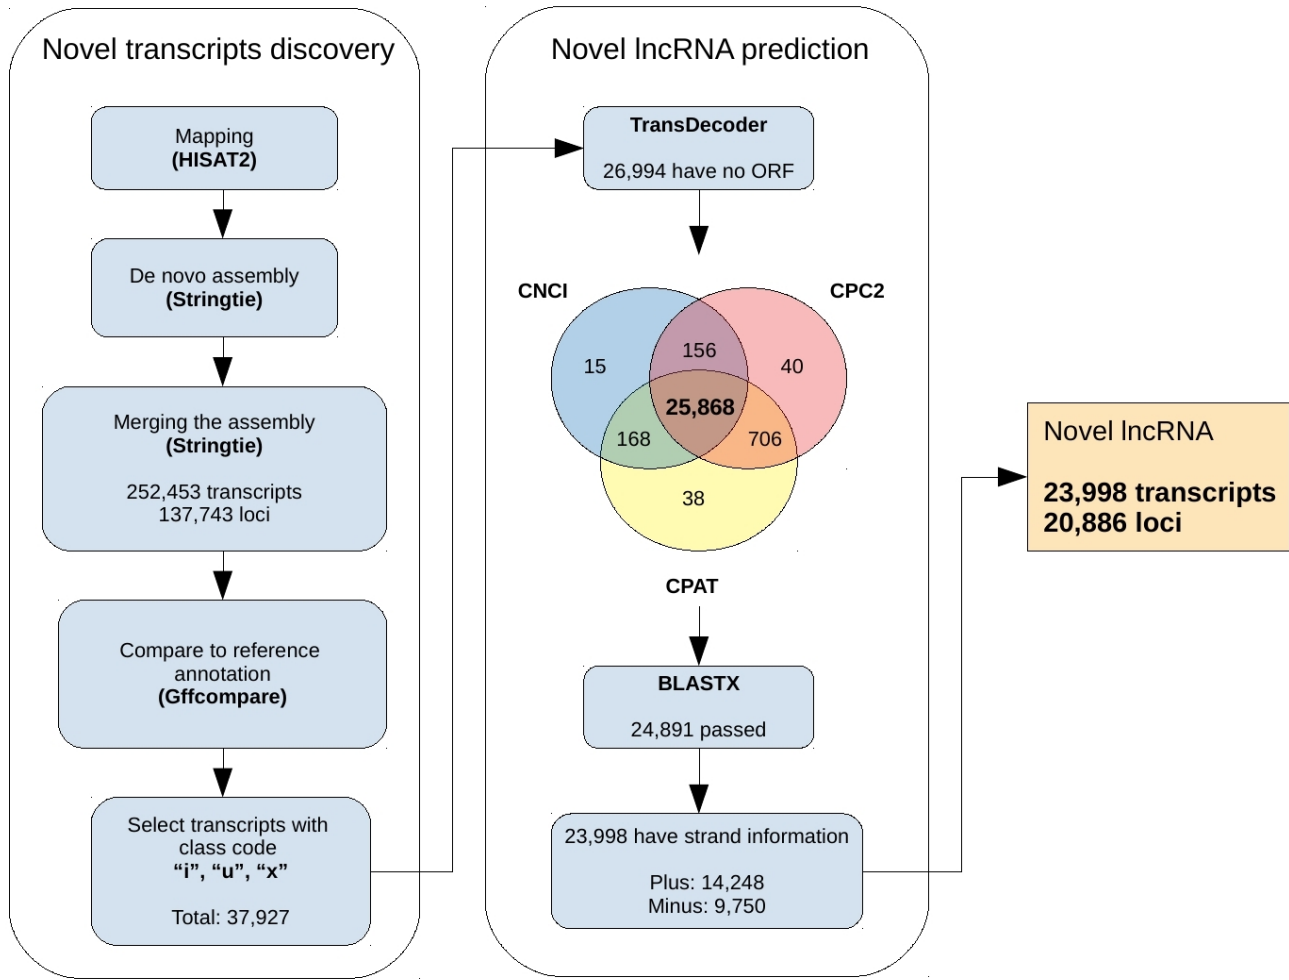

455 **Figure 1** IncRNA identification pipeline

A

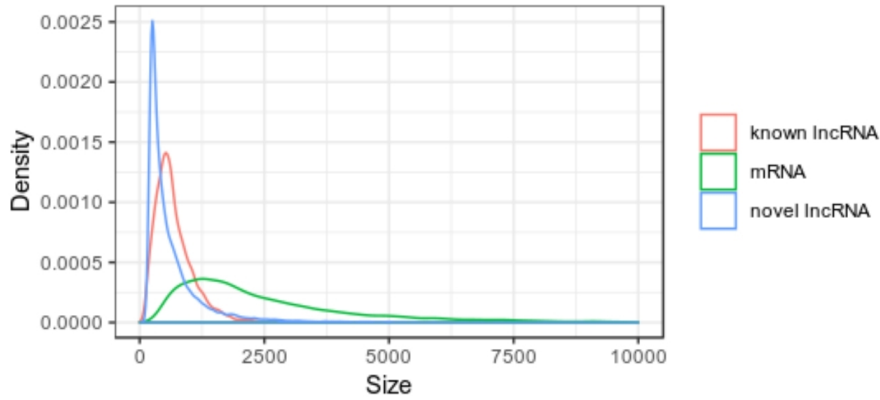

B

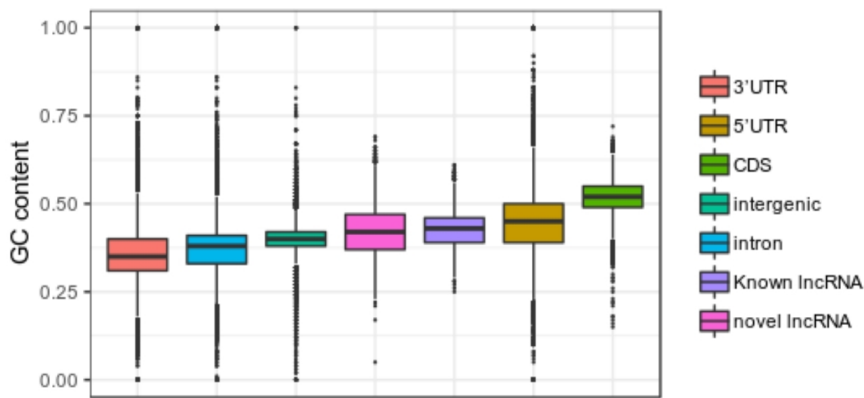

C

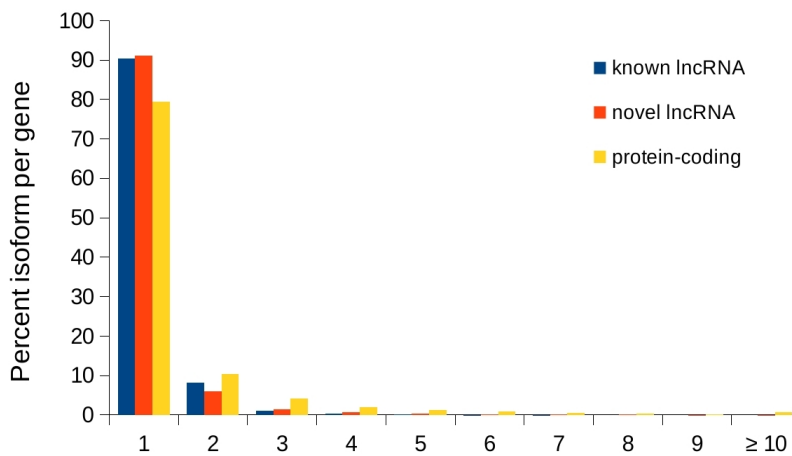

456 **Figure 2** Characterization of *Ae. albopictus* lncRNA (A) Size distribution of mRNA transcripts, novel  
457 and known lncRNA (B) GC content (C) Number of isoform per gene



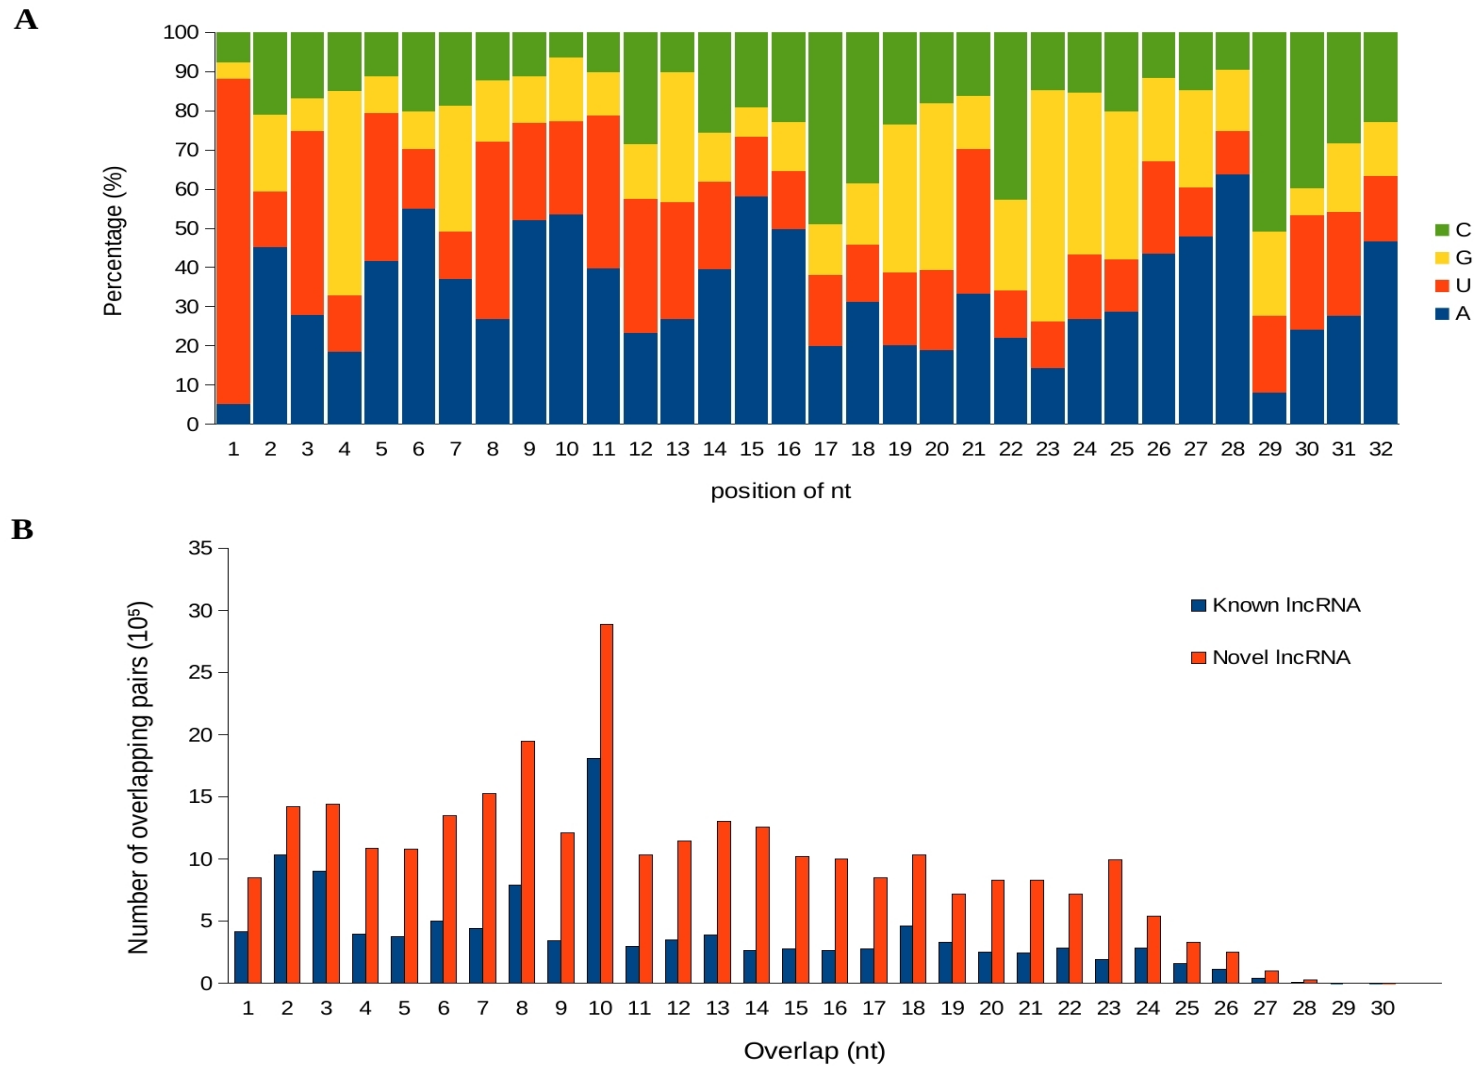

459 **Figure 3** lncRNA-derived piRNA (A) Percentage of nts at each position in the reads. High percentage of U at the first position (B) Ping-  
 460 pong signature of known and novel lncRNA  
 461

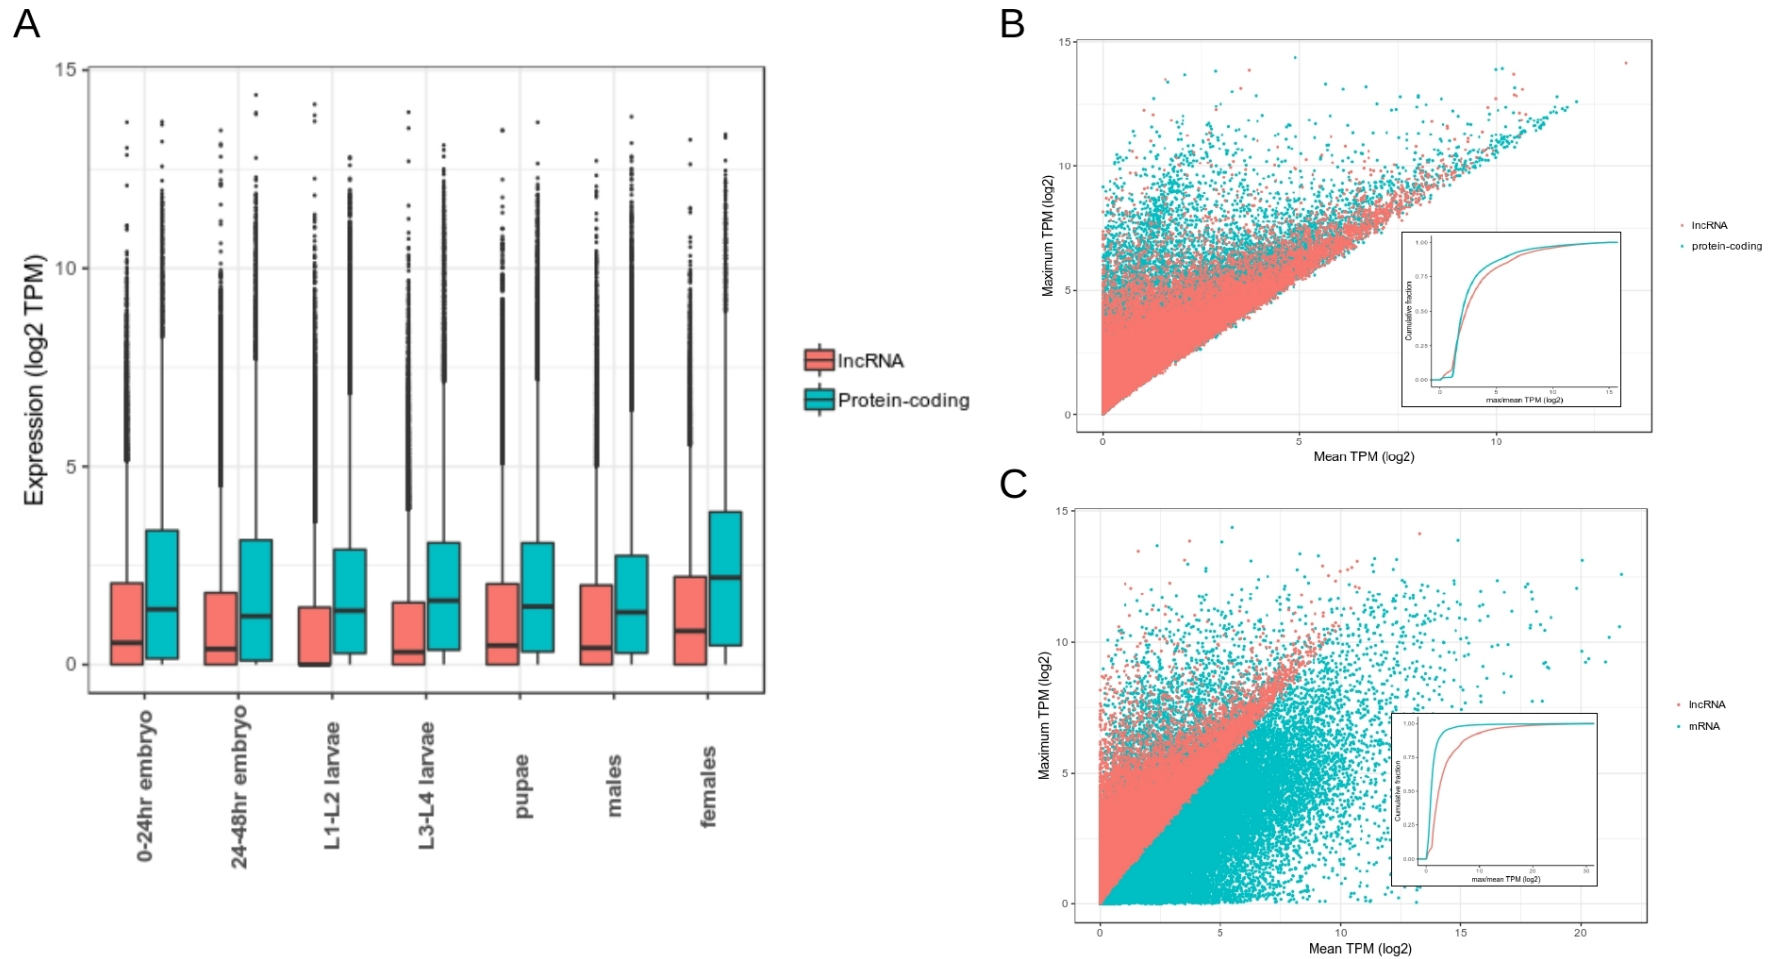

463 **Figure 4** Developmental expression of *Ae. albopictus* lncRNA (A) Distribution of expression of lncRNA and protein-coding genes across  
 464 seven developmental stages. (B) Differential expression at gene level of lncRNAs and protein-coding gene (C) Differential expression at  
 465 transcript level of lncRNA transcripts and mRNA transcripts. In (B) and (C), for each lncRNA and protein-coding gene or mRNA, the  
 466 maximum TPM value across seven developmental stages was plotted with respect to the mean of the remaining six stages. The insets within  
 467 (B) and (C) display cumulative distributions of log<sub>2</sub>-scaled ratios of maximum and mean TPM of lncRNA and protein-coding gene or  
 468 mRNAs.

469  
470  
471  
472  
473  
474  
475  
476  
477  
478  
479  
480  
481  
482  
483  
484  
485  
486  
487  
488  
489  
490  
491  
492  
493  
494  
495  
496  
497  
498  
499  
500  
501  
502  
503  
504  
505  
506  
507  
508  
509  
510  
511  
512  
513  
514  
515  
516  
517

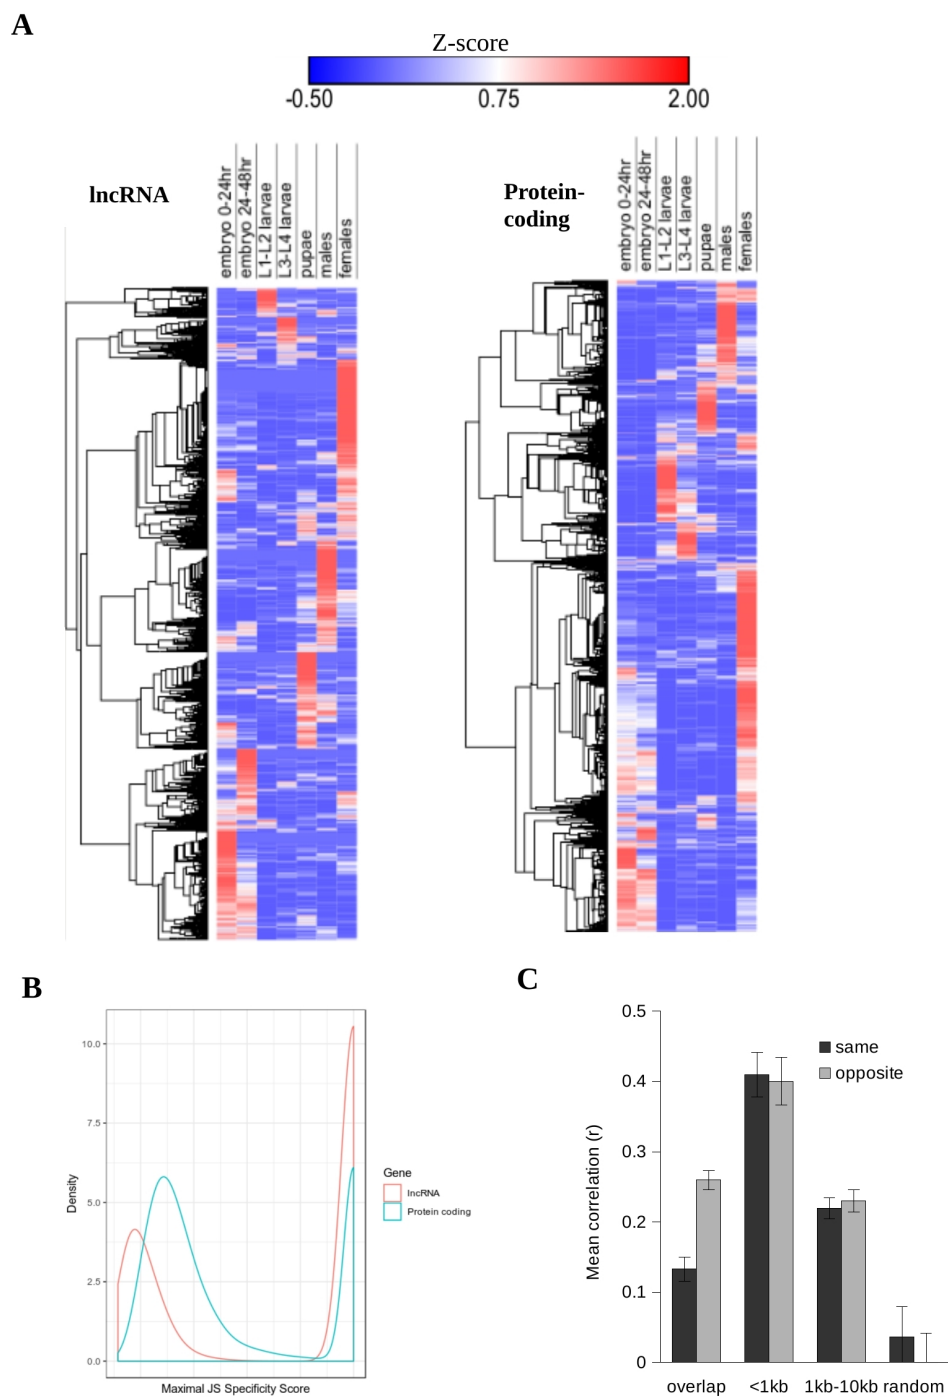

**Figure 5** Stage-specific expression lncRNA and correlation with protein-coding gene (A) Hierarchical clustering of lncRNA and protein-coding gene across seven developmental stages. lncRNA shows tighter clustering than protein-coding gene as displayed by distinct seven nodes on the row dendrogram. (B) The distribution of maximal JS specificity score across seven stages. (C) Correlation between lncRNA expression and their closest neighboring protein-coding gene. The plot shows mean Pearson correlation for lncRNA - protein-coding gene pairs in either on the same of opposite strand. Error bars show the 95% confident interval.

**A**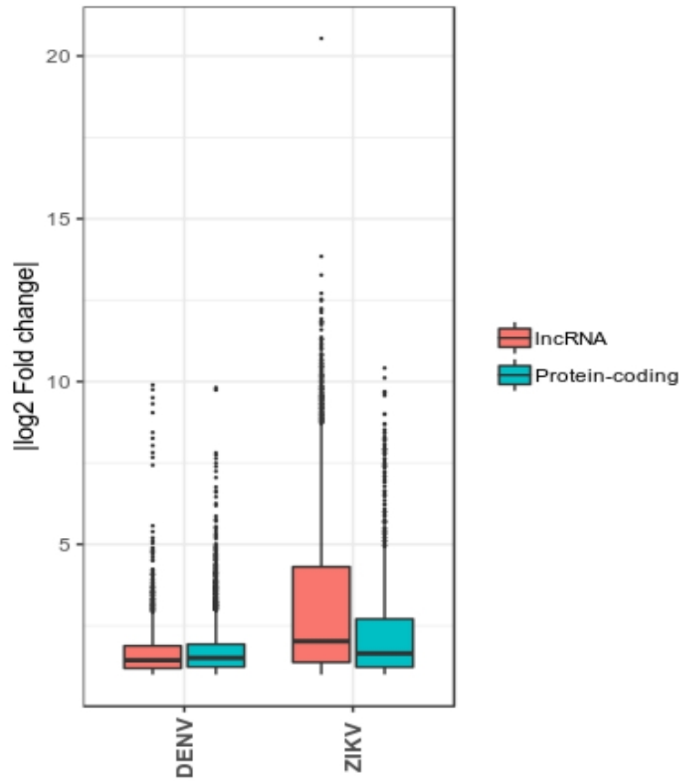**B**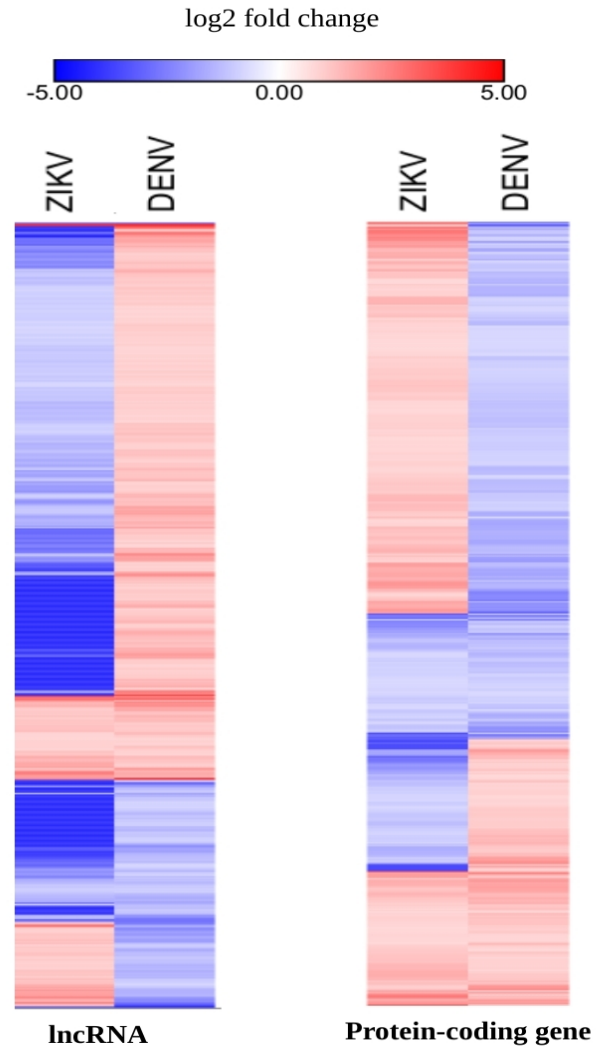

518 **Figure 6** Differential expression of lncRNA upon DENV1 and ZIKV infection (A) Distribution of  $\log_2$  fold change (FDR < 0.01) of  
 519 lncRNA and protein-coding gene in DENV and ZIKV-infected transcriptomes. (B) Heatmaps showing the value of  $\log_2$  fold change (FDR <  
 520 0.01) of lncRNA and protein-coding genes that were differentially expressed in both DENV1 and ZIKV-infected transcriptomes. Large  
 521 number of genes of both lncRNA and protein-coding were found to be upregulated in one transcriptome but downregulated in another.

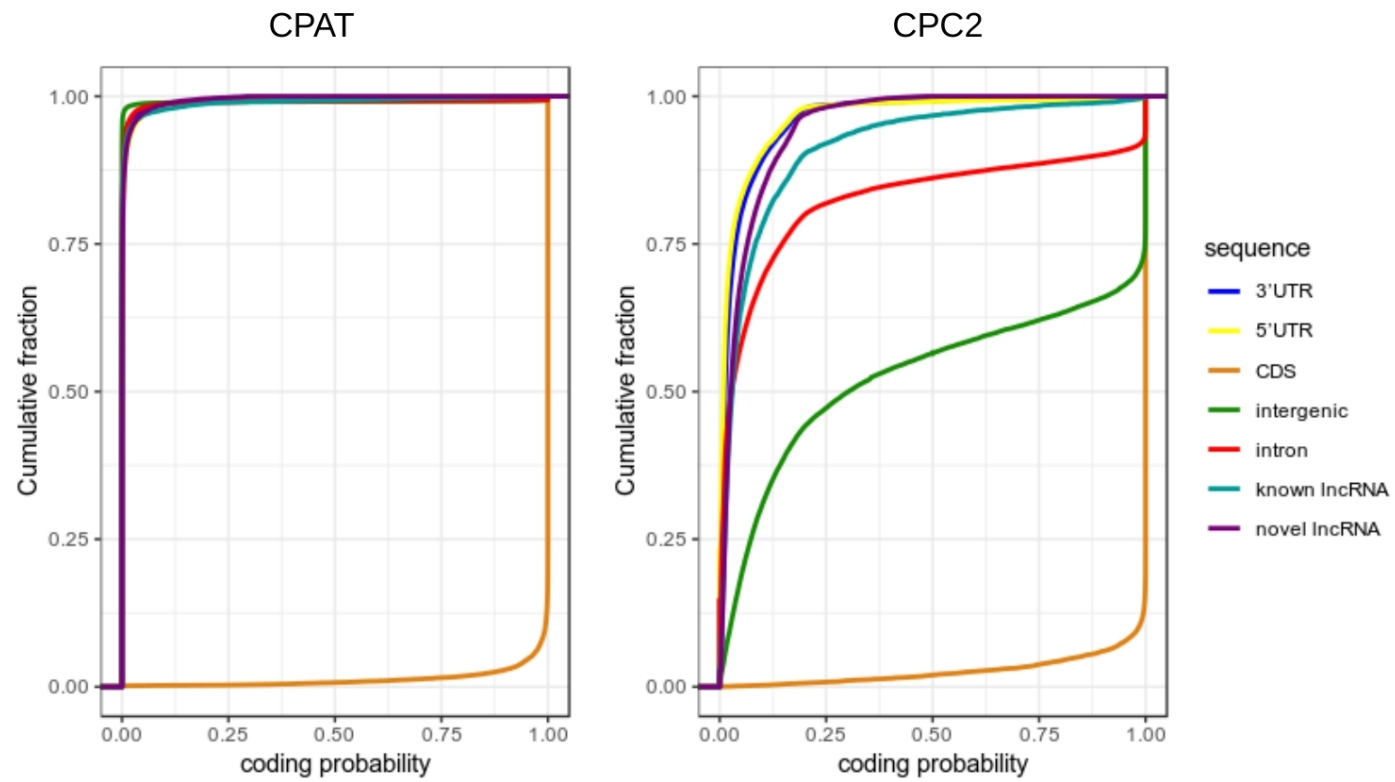

522 **Supplemental Figure 1** Coding probability computed by CPAT and CPC2.

523

524

525

526

527

528

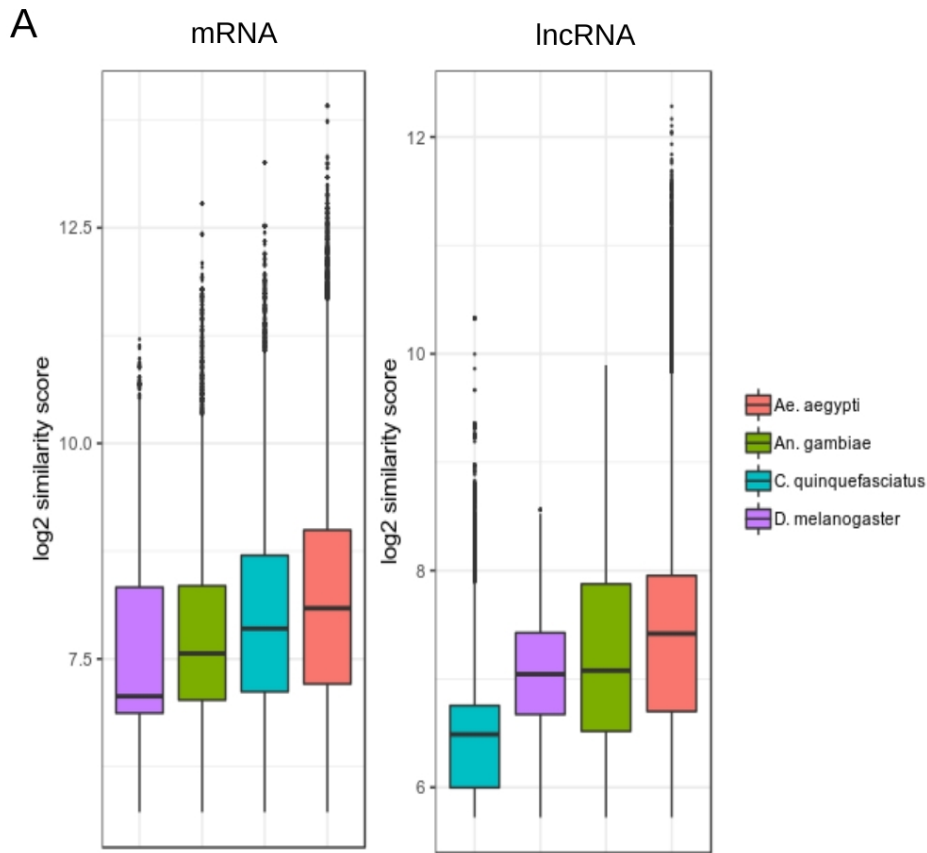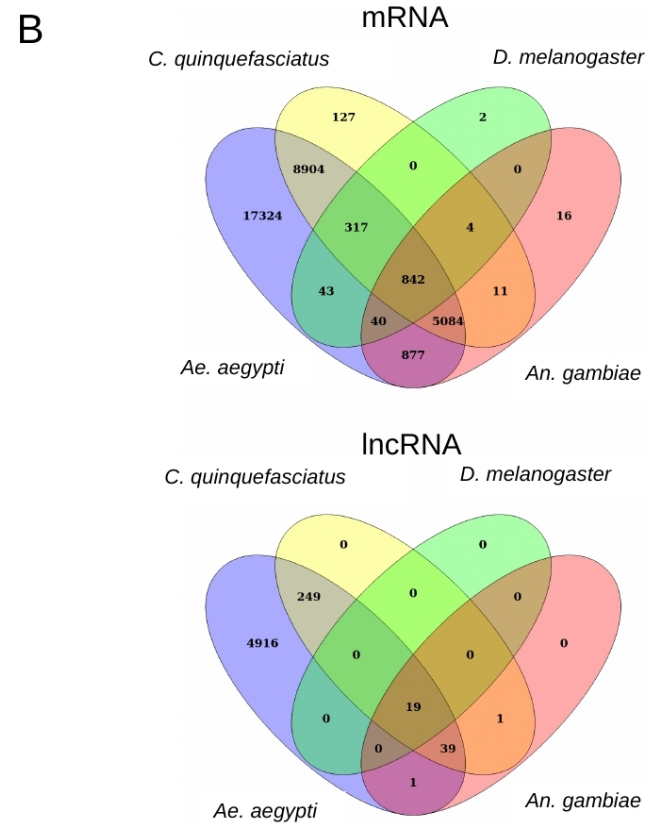

529 **Supplemental Figure 2** Conservation of *Ae. albopictus* lncRNA (A) Similarity bit score of *Ae. albopictus* lncRNA and mRNA transcripts  
 530 with closely related insect genomes. (B) The Venn diagrams show the number of conserved *Ae. albopictus* lncRNAs and mRNAs (BLASTN  
 531 e-value < 10<sup>-50</sup>) with closely related insect genomes.

532  
 533  
 534  
 535  
 536

**A**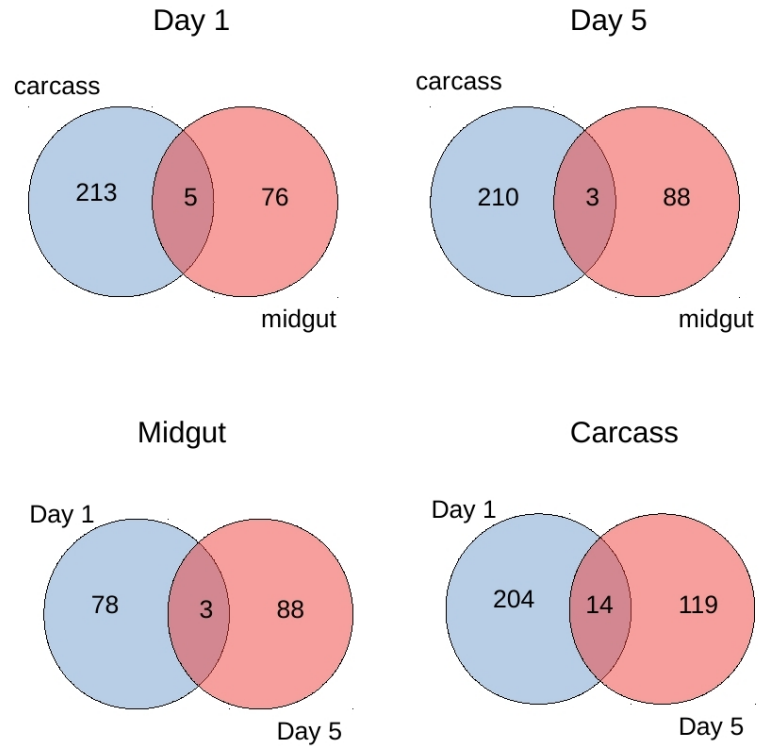**B**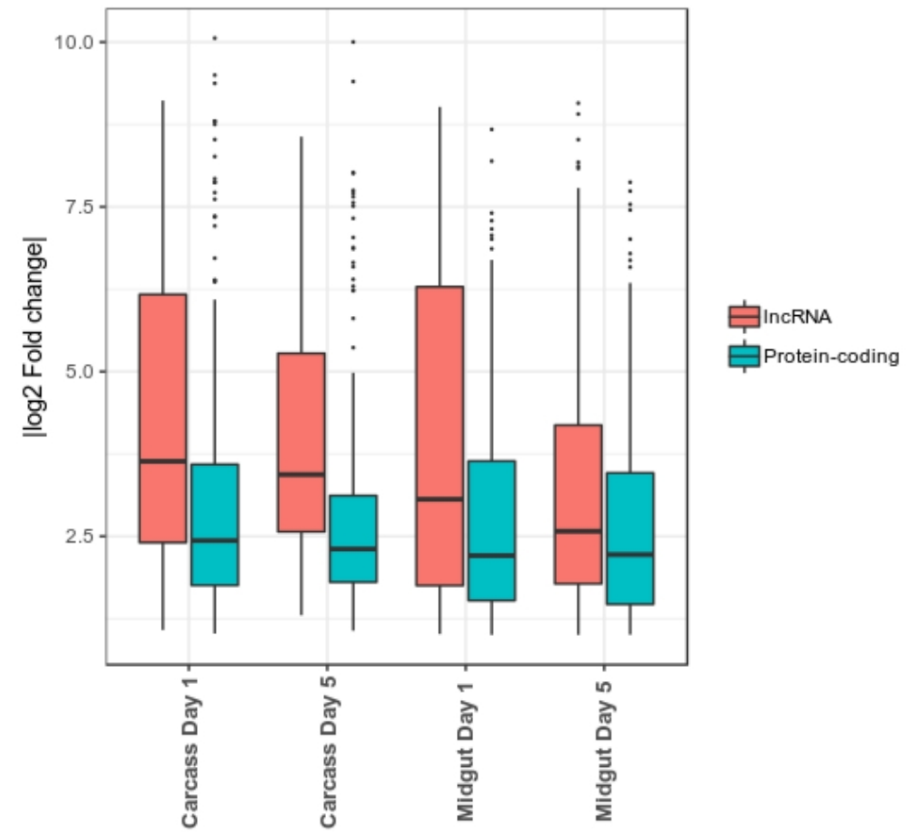

537 **Supplemental Figure 3** Differential expression of lncRNAs in midgut and carcass infected with dengue virus serotype 2 (DENV2) from  
 538 Tsujimoto et al. 2017 (A) Number of lncRNAs that were differentially expressed (FDR < 0.01) in both carcass and midgut in day1 and day 5  
 539 post infection. (B) Distribution of log<sub>2</sub> fold change (FDR < 0.01) of lncRNA and protein-coding gene.

540

541

542

543

544

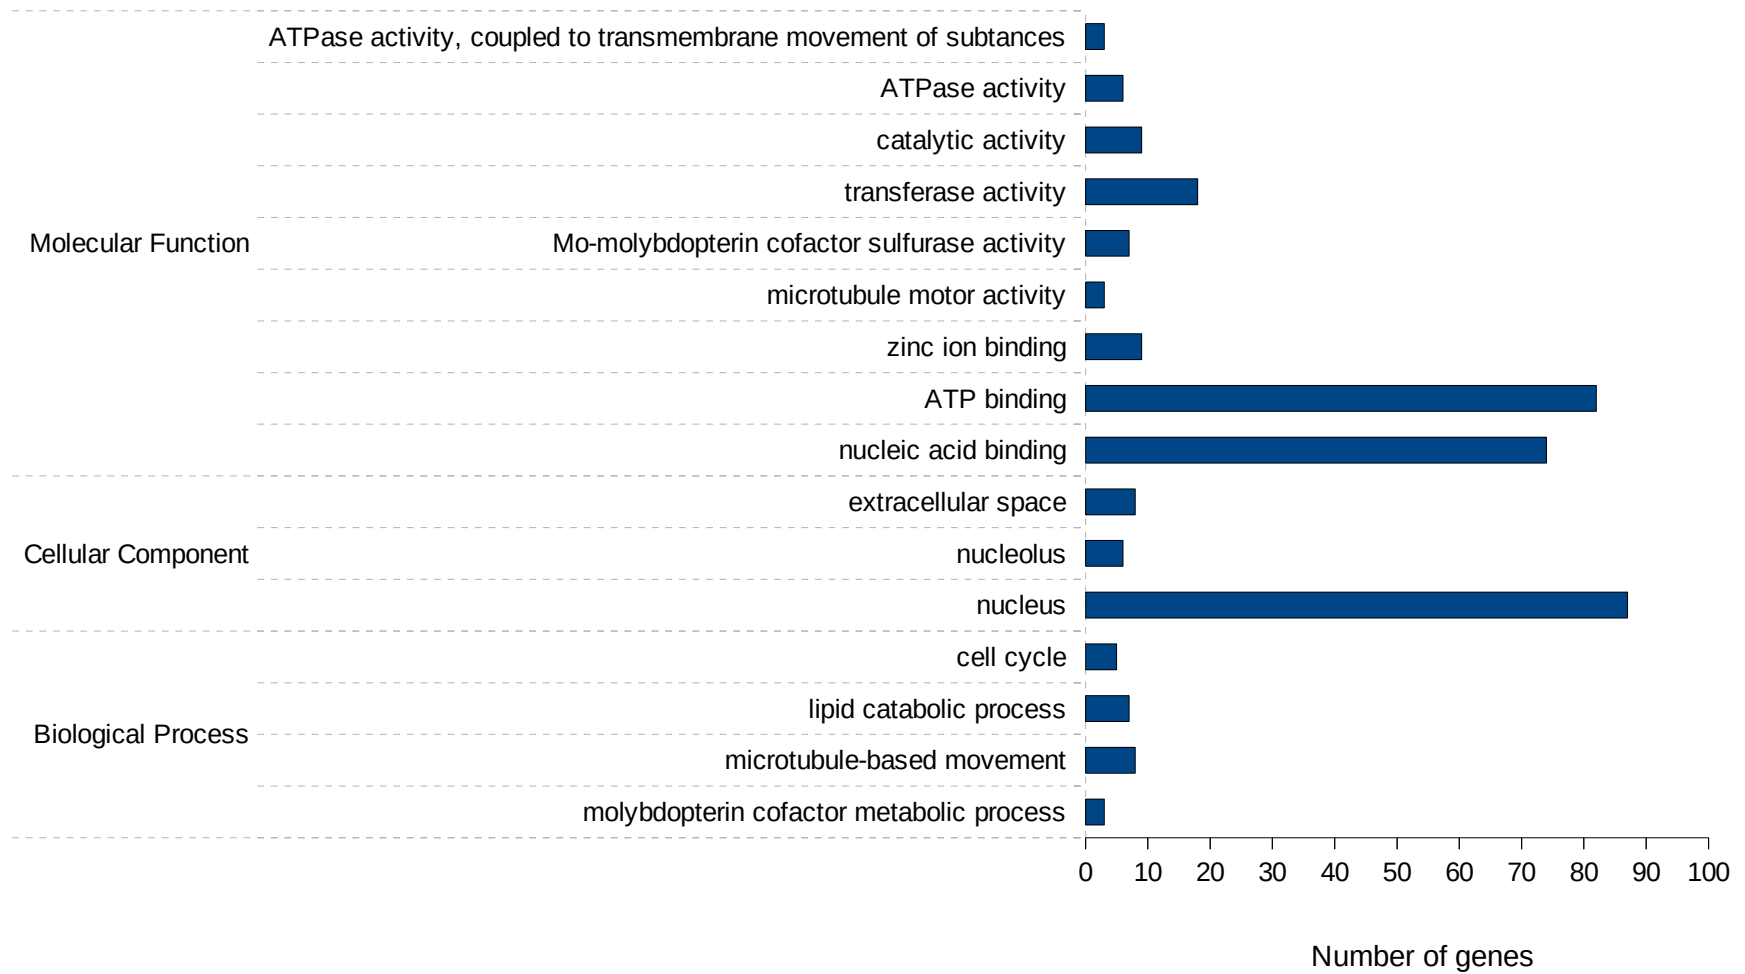

546 **Supplemental Figure 4** Gene ontology analysis of protein-coding genes that were differentially expressed in DENV1 and ZIKV-infected  
 547 C6/36 cells.
